# Supplementary material for: Characterization of UO22+binding to osteopontin, a highly phosphorylated protein: insights into potential mechanisms of uranyl accumulation in bones
Source: Royal Society of Chemistry journal article supplement (doi:10.1039/c3mt00269a), 2013-11-19
Supplement: c3mt00269a.pdf [file c3mt00269a.pdf]

Supplementary data

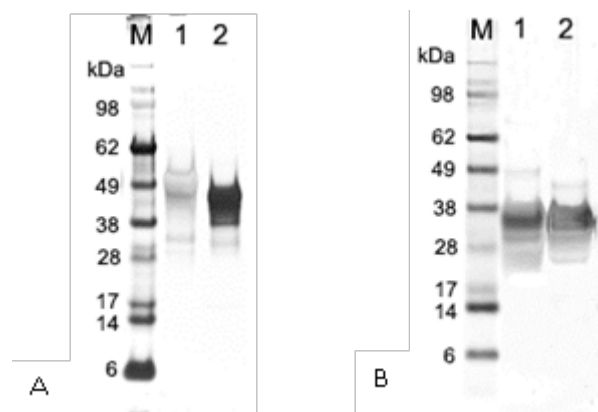

Figure S1: Silver stained PAGE-SDS controls of EbOPN (A) and FbOPN (B) dephosphorylations. 1. EbOPN/ FbOPN; 2. dp-EbOPN/ dp-FbOPN

Dephosphorylation was optimized on FbOPN. A 250U/ FbOPN nmol was found optimal to remove more than 95% of FbOPN phosphorylations. The protocol was then performed on larger quantities of EbOPN and FbOPN.
